# Supplementary material for: The Pandemic and Changes in the Self-Perception of Teacher Digital Competences of Infant Grade Students: A Cross Sectional Study
Source: MDPI journal article supplement (doi:10.3390/ijerph18094756), 2021-04-29
Supplement: s1 [file s1]

## Supplementary Material

**Table S1.** «DigCompEdu Check-In» adaptation

| Competence Area            | Competence                      | Item                                                                                                                                                            | Indicator                                                                                                            | Level |
|----------------------------|---------------------------------|-----------------------------------------------------------------------------------------------------------------------------------------------------------------|----------------------------------------------------------------------------------------------------------------------|-------|
| 1. Professional commitment | A. Organizational communication | I systematically use different digital channels to enhance communication with students and fellow academics e.g., emails, blogs, the department's website, Apps | I rarely use digital communication channels                                                                          | A1    |
|                            |                                 |                                                                                                                                                                 | I use basic digital communication channels, e.g. e-mail                                                              | A2    |
|                            |                                 |                                                                                                                                                                 | I combine different communication channels, e.g., e-mail and class blog or the department's website                  | B1    |
|                            |                                 |                                                                                                                                                                 | I systematically select, adjust and combine different digital solutions to communicate effectively                   | B2    |
|                            |                                 |                                                                                                                                                                 | I reflect on, discuss and proactively develop my communication strategies                                            | C1    |
|                            | B. Professional collaboration   | I use digital technologies to work together with colleagues inside and outside my educational organization                                                      | I rarely have the opportunity to collaborate with other academics                                                    | A1    |
|                            |                                 |                                                                                                                                                                 | Sometimes I exchange materials with colleagues, e.g., via e-mail                                                     | A2    |
|                            |                                 |                                                                                                                                                                 | Among colleagues, we work together in collaborative environments or use shared drives                                | B1    |
|                            |                                 |                                                                                                                                                                 | I exchange ideas and materials, also with academics outside my organization, e.g., in an online professional network | B2    |
|                            |                                 |                                                                                                                                                                 | I jointly create materials with other academics in an online network                                                 | C1    |
|                            | C. Reflective practice          | I actively develop my digital teaching skills                                                                                                                   | I rarely have the time to work on my digital teaching skills                                                         | A1    |

| Competence Area      | Competence                                                                                                             | Item                                                                                                         | Indicator                                                                                         | Level                                                                                                          |
|----------------------|------------------------------------------------------------------------------------------------------------------------|--------------------------------------------------------------------------------------------------------------|---------------------------------------------------------------------------------------------------|----------------------------------------------------------------------------------------------------------------|
| 2. Digital Resources | D. Digital training                                                                                                    | I participate in online training opportunities e.g., online courses, MOOCs, webinars, virtual conferences... | I improve my skills through reflection and experimentation                                        | A2                                                                                                             |
|                      |                                                                                                                        |                                                                                                              | I use a range of resources to develop my digital teaching skills                                  | B1                                                                                                             |
|                      |                                                                                                                        |                                                                                                              | I discuss with peers how to use digital technologies to innovate and improve educational practice | B2                                                                                                             |
|                      |                                                                                                                        |                                                                                                              | I help colleagues in developing their digital teaching strategies.                                | C1                                                                                                             |
|                      |                                                                                                                        |                                                                                                              | This is a new area that I have not yet considered                                                 | A1                                                                                                             |
|                      |                                                                                                                        |                                                                                                              | Not yet, but I am definitely interested                                                           | A2                                                                                                             |
|                      |                                                                                                                        |                                                                                                              | I have participated in online training once or twice                                              | B1                                                                                                             |
|                      |                                                                                                                        |                                                                                                              | I have tried out various different online training opportunities                                  | B2                                                                                                             |
|                      |                                                                                                                        |                                                                                                              | I frequently participate in all kinds of online training                                          | C1                                                                                                             |
|                      |                                                                                                                        |                                                                                                              | A. Selection                                                                                      | I use different internet sites and search strategies to find and select a range of different digital resources |
|                      | I use search engines and resource platforms to find relevant resources                                                 | A2                                                                                                           |                                                                                                   |                                                                                                                |
|                      | I evaluate and select resources on the basis of their suitability for my learner group                                 | B1                                                                                                           |                                                                                                   |                                                                                                                |
|                      | I compare resources using a range of relevant criteria, e.g., reliability, quality, fit, design, interactivity, appeal | B2                                                                                                           |                                                                                                   |                                                                                                                |
|                      | I advise colleagues on suitable resources and search strategies                                                        | C1                                                                                                           |                                                                                                   |                                                                                                                |
|                      |                                                                                                                        |                                                                                                              | I do not create my own digital resources                                                          | A1                                                                                                             |

| Competence Area     | Competence                                 | Item                                                                                                                          | Indicator                                                                                                                      | Level |
|---------------------|--------------------------------------------|-------------------------------------------------------------------------------------------------------------------------------|--------------------------------------------------------------------------------------------------------------------------------|-------|
| 3. Digital pedagogy | B. Creation and modification               | I create my own digital resources and modify existing ones to adapt them to my needs                                          | I do create lecture notes or reading lists with a computer, but then I print them                                              | A2    |
|                     |                                            |                                                                                                                               | I create digital presentations, but not much more                                                                              | B1    |
|                     |                                            |                                                                                                                               | I create and modify different types of resources                                                                               | B2    |
|                     |                                            |                                                                                                                               | I set up and adapt complex, interactive resources                                                                              | C1    |
|                     | C. Administration, exchange and protection | I effectively protect sensitive content, e.g. exams, students' grades, personal data                                          | I do not need to do that, because the department takes care of this                                                            | A1    |
|                     |                                            |                                                                                                                               | I avoid storing personal data electronically                                                                                   | A2    |
|                     |                                            |                                                                                                                               | I protect some personal data                                                                                                   | B1    |
|                     |                                            |                                                                                                                               | I password protect files with personal data                                                                                    | B2    |
|                     |                                            |                                                                                                                               | I comprehensively protect personal data, e.g., combining hard-to-guess passwords with encryption and frequent software updates | C1    |
|                     | A. Teaching and Learning                   | I carefully consider how, when and why to use digital technologies in teaching, to ensure that they are used with added value | I do not or only rarely use technology in class                                                                                | A1    |
|                     |                                            |                                                                                                                               | I make basic use of available equipment, e.g., digital whiteboards or projectors                                               | A2    |
|                     |                                            |                                                                                                                               | I use a variety of digital strategies in my teaching                                                                           | B1    |
|                     |                                            |                                                                                                                               | I use digital tools to systematically enhance teaching                                                                         | B2    |
|                     |                                            |                                                                                                                               | I use digital tools to implement innovative pedagogic strategies                                                               | C1    |
|                     | B. Guide                                   | I monitor my students' activities and interactions in the collaborative online environments we use                            | I do not use digital environments with my students                                                                             | A1    |
|                     |                                            |                                                                                                                               | I do not monitor student activity in the online environments we use                                                            | A2    |
|                     |                                            |                                                                                                                               | I occasionally check on them and their discussions                                                                             | B1    |
|                     |                                            |                                                                                                                               | I regularly monitor and analyse my students' online activity                                                                   | B2    |

| Competence Area | Competence                | Item                                                                                                                                                                                                                            | Indicator                                                                                                                 | Level |
|-----------------|---------------------------|---------------------------------------------------------------------------------------------------------------------------------------------------------------------------------------------------------------------------------|---------------------------------------------------------------------------------------------------------------------------|-------|
| 4. Evaluation   | C. Collaborative learning | When my students work in groups or teams, they use digital technologies to acquire and document evidence                                                                                                                        | I regularly intervene with motivating or corrective comments                                                              | C1    |
|                 |                           |                                                                                                                                                                                                                                 | My students do not work in groups                                                                                         | A1    |
|                 |                           |                                                                                                                                                                                                                                 | It is not possible for me to integrate digital technologies into group work                                               | A2    |
|                 |                           |                                                                                                                                                                                                                                 | I encourage students working in groups to search for information online or to present their results in digital format     | B1    |
|                 |                           |                                                                                                                                                                                                                                 | I require students working in teams to use the internet to find information and present their results in a digital format | B2    |
|                 |                           |                                                                                                                                                                                                                                 | My students exchange evidence and jointly create knowledge in a collaborative online space                                | C1    |
|                 | D. Self-directed learning | I use digital technologies to allow students to plan, document and monitor their learning themselves<br>e.g., quizzes for self-assessment, ePortfolios for documentation and showcasing, online diaries/blogs for reflection... | Not possible in my work environment                                                                                       | A1    |
|                 |                           |                                                                                                                                                                                                                                 | My students do reflect on their learning, but not with digital technologies                                               | A2    |
|                 |                           |                                                                                                                                                                                                                                 | Sometimes I use, for example, quizzes for self-assessment                                                                 | B1    |
|                 |                           |                                                                                                                                                                                                                                 | I use a variety of digital tools to allow learners to plan, document or reflect on their learning                         | B2    |
|                 |                           |                                                                                                                                                                                                                                 | I systematically integrate different digital tools to allow learners to plan, monitor and reflect on their progress       | C1    |
|                 |                           |                                                                                                                                                                                                                                 |                                                                                                                           |       |
|                 | A. Assessment strategies  | I use digital assessment formats to monitor student progress                                                                                                                                                                    | I do not monitor students' progress                                                                                       | A1    |
|                 |                           |                                                                                                                                                                                                                                 | I do monitor students' progress regularly, but not with digital means                                                     | A2    |
|                 |                           |                                                                                                                                                                                                                                 | Sometimes I use a digital tool, e.g., a quiz, to check on students' progress                                              | B1    |

| Competence Area                      | Competence                                                                                                                                                                                                                                                                                                                                                                                                                                                                                  | Item | Indicator                                                                                                                                | Level |
|--------------------------------------|---------------------------------------------------------------------------------------------------------------------------------------------------------------------------------------------------------------------------------------------------------------------------------------------------------------------------------------------------------------------------------------------------------------------------------------------------------------------------------------------|------|------------------------------------------------------------------------------------------------------------------------------------------|-------|
| B. Analysis of evidence and evidence | I analyse all data available to me to timely identify students who need additional support<br>"Data" includes: students' engagement, performance, grades, attendance; activities and social interactions in (online) environments;<br>"Students who need additional support" are: students who are at risk of dropping out or underperforming; students who have learning disorders or specific learning needs, students who lack transversal skills, e.g., social, verbal or study skills. |      | I use a variety of digital tools to monitor student progress                                                                             | B2    |
|                                      |                                                                                                                                                                                                                                                                                                                                                                                                                                                                                             |      | I systematically use a variety of digital tools to monitor student progress                                                              | C1    |
|                                      |                                                                                                                                                                                                                                                                                                                                                                                                                                                                                             |      | These data are not available and/or it is not my responsibility to analyse them                                                          | A1    |
|                                      |                                                                                                                                                                                                                                                                                                                                                                                                                                                                                             |      | I only analyse academically relevant data, e.g., performance and grades                                                                  | A2    |
|                                      |                                                                                                                                                                                                                                                                                                                                                                                                                                                                                             |      | I also consider data on student activity and behaviour to identify students who need additional support                                  | B1    |
|                                      |                                                                                                                                                                                                                                                                                                                                                                                                                                                                                             |      | I regularly screen all available evidence to identify students who need additional support                                               | B2    |
|                                      |                                                                                                                                                                                                                                                                                                                                                                                                                                                                                             |      |                                                                                                                                          | C1    |
|                                      |                                                                                                                                                                                                                                                                                                                                                                                                                                                                                             |      | I systematically analyse data and intervene in a timely manner                                                                           |       |
|                                      |                                                                                                                                                                                                                                                                                                                                                                                                                                                                                             |      |                                                                                                                                          |       |
|                                      |                                                                                                                                                                                                                                                                                                                                                                                                                                                                                             |      |                                                                                                                                          |       |
| C. Feedback and planning             | I use digital technologies to provide effective feedback                                                                                                                                                                                                                                                                                                                                                                                                                                    |      | Feedback is not necessary in my work environment                                                                                         | A1    |
|                                      |                                                                                                                                                                                                                                                                                                                                                                                                                                                                                             |      | I do provide feedback to students, but not in digital format                                                                             | A2    |
|                                      |                                                                                                                                                                                                                                                                                                                                                                                                                                                                                             |      | Sometimes I use digital ways of providing feedback, e.g., automatic scores in online quizzes, comments or "likes" in online environments | B1    |
|                                      |                                                                                                                                                                                                                                                                                                                                                                                                                                                                                             |      | I use a variety of digital ways of providing feedback                                                                                    | B2    |
|                                      |                                                                                                                                                                                                                                                                                                                                                                                                                                                                                             |      | I systematically use digital approaches to provide feedback                                                                              | C1    |

| Competence Area | Competence                           | Item                                                                                                                                                                                                    | Indicator                                                                                                          | Level |
|-----------------|--------------------------------------|---------------------------------------------------------------------------------------------------------------------------------------------------------------------------------------------------------|--------------------------------------------------------------------------------------------------------------------|-------|
| 5. Empower      | A. Accessibility and inclusion       | When I create digital assignments for students I consider and address potential digital problems                                                                                                        | I do not create digital assignments                                                                                | A1    |
|                 |                                      |                                                                                                                                                                                                         | My students do not have problems with using digital technology                                                     | A2    |
|                 |                                      |                                                                                                                                                                                                         | I adapt the task so as to minimize difficulties                                                                    | B1    |
|                 |                                      |                                                                                                                                                                                                         | I discuss possible obstacles with students and outline solutions                                                   | B2    |
|                 |                                      |                                                                                                                                                                                                         | I allow for variety, e.g. I adapt the task, discuss solutions and provide alternative ways for completing the task | C1    |
|                 | B. Differentiation and customization | I use digital technologies to offer students personalised learning opportunities e.g. I give different students different digital tasks to address individual learning needs, preferences and interests | In my work environment, all students are required to do the same activities, irrespective of their level           | A1    |
|                 |                                      |                                                                                                                                                                                                         | I do provide students with recommendations for additional resources                                                | A2    |
|                 |                                      |                                                                                                                                                                                                         | I provide optional digital activities for those who are advanced or lagging behind                                 | B1    |
|                 |                                      |                                                                                                                                                                                                         | Whenever possible, I use digital technologies to offer differentiated learning opportunities                       | B2    |
|                 |                                      |                                                                                                                                                                                                         | I systematically adapt my teaching to link to students' individual learning needs, preferences and interests       | C1    |
|                 | C. Active participation of students  | I use digital technologies for students to actively participate in classes                                                                                                                              | In my work environment it is not possible to actively involve students in class                                    | A1    |
|                 |                                      |                                                                                                                                                                                                         | I do involve students actively, but not with digital technologies                                                  | A2    |
|                 |                                      |                                                                                                                                                                                                         | When instructing, I use motivating stimuli, e.g., videos, animations, cartoons                                     | B1    |
|                 |                                      |                                                                                                                                                                                                         | My students engage with digital media in my classes, e.g., electronic worksheets, games, quizzes                   | B2    |

| Competence Area                              | Competence                                 | Item                                                                                                                                        | Indicator                                                                                                  | Level |
|----------------------------------------------|--------------------------------------------|---------------------------------------------------------------------------------------------------------------------------------------------|------------------------------------------------------------------------------------------------------------|-------|
| 6. Facilitating Learners' Digital Competence | A. Information and media literacy          | I teach students how to assess the reliability of information and to identify misinformation and bias                                       | My students systematically use digital technologies to investigate, discuss and create knowledge           | C1    |
|                                              |                                            |                                                                                                                                             | This is not possible in my subject or work environment                                                     | A1    |
|                                              |                                            |                                                                                                                                             | I occasionally remind them that not all online information is reliable                                     | A2    |
|                                              |                                            |                                                                                                                                             | I teach them how to discern reliable and unreliable sources                                                | B1    |
|                                              |                                            |                                                                                                                                             | I discuss with students how to verify the accuracy of information                                          | B2    |
|                                              |                                            |                                                                                                                                             | We comprehensively discuss how information is generated and can be distorted                               | C1    |
|                                              | B. Communication and digital collaboration | I set up assignments which require students to use digital means to communicate and collaborate with each other or with an outside audience | This is not possible in my subject or work environment                                                     | A1    |
|                                              |                                            |                                                                                                                                             | Only on rare occasions are my students required to communicate or collaborate online                       | A2    |
|                                              |                                            |                                                                                                                                             | My students use digital communication and cooperation mainly among each other                              | B1    |
|                                              |                                            |                                                                                                                                             | My students use digital ways to communicate and to cooperate with each other and with an external audience | B2    |
|                                              |                                            |                                                                                                                                             | I systematically set assignments that allow students to slowly expand their skills                         | C1    |
|                                              | C. Creation of digital content             | I set up assignments which require students to create digital content e.g. videos, audios, photos, digital presentations, blogs, wikis...   | This is not possible in my subject or work environment                                                     | A1    |
|                                              |                                            |                                                                                                                                             | This is difficult to implement with my students                                                            | A2    |
|                                              |                                            |                                                                                                                                             | Sometimes, for diversion and motivation                                                                    | B1    |

| Competence Area | Competence                 | Item                                                                                                                                                              | Indicator                                                                                                                        | Level |
|-----------------|----------------------------|-------------------------------------------------------------------------------------------------------------------------------------------------------------------|----------------------------------------------------------------------------------------------------------------------------------|-------|
|                 |                            |                                                                                                                                                                   | My students create digital content as integral part of their study                                                               | B2    |
|                 |                            |                                                                                                                                                                   | This is an integral part of their learning and I systematically increase the level of difficulty to further develop their skills | C1    |
|                 | D. Responsible use         | I teach students how to behave safely and responsibly online                                                                                                      | This is not possible in my subject or work environment                                                                           | A1    |
|                 |                            |                                                                                                                                                                   | I inform them that they have to be careful with relaying personal information online                                             | A2    |
|                 |                            |                                                                                                                                                                   | I explain the basic rules for safely and responsibly acting in online environments                                               | B1    |
|                 |                            |                                                                                                                                                                   | We discuss and agree on rules of conduct                                                                                         | B2    |
|                 |                            |                                                                                                                                                                   | I systematically develop my students' use of social rules in the different digital environments we use                           | C1    |
|                 | E. Digital troubleshooting | I encourage students to use digital technologies creatively to solve concrete problems e.g., to overcome obstacles or challenges emerging in the learning process | This is not possible with my students, in my work environment                                                                    | A1    |
|                 |                            |                                                                                                                                                                   | I rarely have the opportunity to foster students' digital problem solving                                                        | A2    |
|                 |                            |                                                                                                                                                                   | Occasionally, whenever an opportunity arises                                                                                     | B1    |
|                 |                            |                                                                                                                                                                   | We often experiment with technological solutions to problems                                                                     | B2    |
|                 |                            |                                                                                                                                                                   | I systematically integrate opportunities for creative digital problem solving                                                    | C1    |
